# Supplementary material for: SDS-PAGE Protein and HPTLC Polyphenols Profiling as a Promising Tool for Authentication of Goldenrod Honey
Source: MDPI journal article supplement (doi:10.3390/foods11162390), 2022-08-09
Supplement: s1 [file s1]

Table S1. Physicochemical parameters of goldenrod honeys

|                                  | Water content<br>[%]       | pH                          | Acidity<br>[mEq/kg]       | Conductivity<br>[mS/cm]     | HMF content<br>[mg/kg]    |
|----------------------------------|----------------------------|-----------------------------|---------------------------|-----------------------------|---------------------------|
| 1                                | 17.05 ± 0.65 <sup>a</sup>  | 4.07 ± 0.005 <sup>a</sup>   | 21.95 ± 0.00 <sup>a</sup> | 0.199 ± 0.0005 <sup>a</sup> | 20.09 ± 0.34 <sup>a</sup> |
| 2                                | 19.55 ± 0.25 <sup>b</sup>  | 4.10 ± 0.00 <sup>ad</sup>   | 28.15 ± 0.05 <sup>b</sup> | 0.172 ± 0.000 <sup>b</sup>  | 12.86 ± 0.24 <sup>b</sup> |
| 3                                | 17.40 ± 0.10 <sup>ac</sup> | 4.68 ± 0.01 <sup>b</sup>    | 24.70 ± 0.40 <sup>c</sup> | 0.418 ± 0.0005 <sup>c</sup> | 14.40 ± 0.83 <sup>b</sup> |
| 4                                | 19.10 ± 0.20 <sup>b</sup>  | 4.30 ± 0.00 <sup>c</sup>    | 15.15 ± 0.15 <sup>d</sup> | 0.227 ± 0.001 <sup>d</sup>  | 23.60 ± 0.26 <sup>c</sup> |
| 5                                | 19.40 ± 0.40 <sup>b</sup>  | 4.15 ± 0.005 <sup>ae</sup>  | 13.95 ± 0.05 <sup>e</sup> | 0.139 ± 0.000 <sup>e</sup>  | 20.16 ± 0.36 <sup>a</sup> |
| 6                                | 17.00 ± 0.40 <sup>a</sup>  | 4.28 ± 0.005 <sup>c</sup>   | 17.95 ± 0.25 <sup>f</sup> | 0.178 ± 0.0005 <sup>f</sup> | 26.86 ± 0.56 <sup>d</sup> |
| 7                                | 17.60 ± 0.30 <sup>ac</sup> | 4.23 ± 0.005 <sup>ce</sup>  | 16.40 ± 0.40 <sup>g</sup> | 0.250 ± 0.0015 <sup>g</sup> | 23.02 ± 0.22 <sup>c</sup> |
| 8                                | 18.05 ± 0.05 <sup>c</sup>  | 4.20 ± 0.005 <sup>cde</sup> | 18.20 ± 0.80 <sup>f</sup> | 0.219 ± 0.0005 <sup>h</sup> | 4.80 ± 0.32 <sup>e</sup>  |
| 9                                | 18.05 ± 0.15 <sup>c</sup>  | 4.22 ± 0.005 <sup>ce</sup>  | 18.00 ± 0.10 <sup>f</sup> | 0.240 ± 0.0005 <sup>i</sup> | 20.72 ± 0.20 <sup>a</sup> |
| 10                               | 16.55 ± 0.15 <sup>a</sup>  | 4.60 ± 0.005 <sup>b</sup>   | 32.55 ± 0.35 <sup>h</sup> | 0.592 ± 0.000 <sup>j</sup>  | 30.51 ± 0.27 <sup>f</sup> |
| Applicable limits [EU Directive] | max. 20%                   | -                           | max. 50                   | max. 0.8                    | max. 40                   |

Means sharing the same letters in the column are significantly different at p=0.05

Table S2. Polyphenols content and antioxidant capacity of *Solidago* spp. extracts

| Sample               |   | TPC<br>[mg<br>GAE/100 g]  | TFC<br>[mg QE/100 g]      | DPPH<br>[μmol TE/100 g]      | FRAP<br>[μmol TE/100 g]     | CUPRAC<br>[mmol TE/100 g] |
|----------------------|---|---------------------------|---------------------------|------------------------------|-----------------------------|---------------------------|
| <i>S. virgaurea</i>  | L | 77.03 ± 5.51 <sup>a</sup> | 25.80 ± 0.66 <sup>a</sup> | 206.49 ± 9.80 <sup>a</sup>   | 412.50 ± 22.79 <sup>a</sup> | 4.44 ± 0.98 <sup>a</sup>  |
|                      | F | 44.94 ± 2.63 <sup>A</sup> | 18.40 ± 0.53 <sup>A</sup> | 112.12 ± 3.21 <sup>A</sup>   | 208.88 ± 17.56 <sup>A</sup> | 1.97 ± 0.14 <sup>A</sup>  |
| <i>S. canadensis</i> | L | 49.26 ± 2.63 <sup>b</sup> | 21.09 ± 0.62 <sup>a</sup> | 95.98 ± 4.60 <sup>b</sup>    | 215.90 ± 6.09 <sup>b</sup>  | 2.06 ± 0.03 <sup>b</sup>  |
|                      | F | 47.92 ± 0.79 <sup>A</sup> | 27.53 ± 0.84 <sup>B</sup> | 120.87 ± 10.60 <sup>AB</sup> | 222.26 ± 5.12 <sup>A</sup>  | 2.09 ± 0.15 <sup>A</sup>  |
| <i>S. gigantea</i>   | L | 86.76 ± 4.66 <sup>a</sup> | 55.95 ± 3.35 <sup>b</sup> | 226.19 ± 4.18 <sup>c</sup>   | 435.75 ± 20.79 <sup>a</sup> | 3.95 ± 0.29 <sup>a</sup>  |
|                      | F | 49.26 ± 1.83 <sup>A</sup> | 37.86 ± 0.68 <sup>C</sup> | 131.01 ± 2.42 <sup>B</sup>   | 213.16 ± 11.31 <sup>A</sup> | 1.92 ± 0.04 <sup>A</sup>  |

L – leaf, F – flower. Means sharing the same letter in the column (lowercase for leaves and uppercase for flowers) are significantly different at p=0.05
